# Supplementary material for: Untargeted Metabolomics of Fermented Rice Using UHPLC Q-TOF MS/MS Reveals an Abundance of Potential Antihypertensive Compounds
Source: PubMed Central journal article supplement (PMC7466378; doi:10.3390/foods9081007), 2020-07-27
Supplement: foods-09-01007-s001.pdf [file foods-09-01007-s001.pdf]

## Supplementary data

**Table S1.** Procedure for assay of ACE activity.

|                                          | Test samples | Positive control | Negative control |
|------------------------------------------|--------------|------------------|------------------|
| ACE-1 positive control ( $\mu\text{l}$ ) | 10           | 10               | 10               |
| ACE1 assay buffer ( $\mu\text{l}$ )      | 40           | 40               | 60               |
| Inhibitor ( $\mu\text{L}$ )              | 20           | 20               | 0                |
| ACE-1 substrate ( $\mu\text{l}$ )        | 50           | 50               | 50               |

**Table S2.** Organic acids and volatile compounds in destarched rice, Prozyme treated destarched rice (DP) and fermented DP.

| Retention Time (min) | Adduct / Charge | Peak area       |                                |              | Precursor mass | Found at mass | Formula finder results | Organic acids        |
|----------------------|-----------------|-----------------|--------------------------------|--------------|----------------|---------------|------------------------|----------------------|
|                      |                 | Destarched rice | Destarched rice + Prozyme (DP) | Fermented DP |                |               |                        |                      |
| 1                    | [M-H]-          | 20840000        | 1.80E+07                       | 2.01E+07     | 195.052        | 195.0511      | C6H12O7                | Gluconic acid        |
| 1.01                 | [M-H]-          | 328000          | 3.31E+05                       | 0            | 209.031        | 209.0307      | C6H10O8                | Glucaric acid        |
| 1.17                 | [M-H]-          | 151700          | 2.39E+05                       | 1.96E+06     | 133.015        | 133.0143      | C4H6O5                 | Malic acid           |
| 1.49                 | [M-H]-          | 64250           | 8.04E+04                       | 5.62E+05     | 111.01         | 111.0089      | C5H4O3                 | Furoic acid          |
| 1.79                 | [M-H]-          | 178600          | 1.83E+05                       | 0.00E+00     | 117.02         | 117.0194      | C4H6O4                 | Succinic acid        |
| 2.44                 | [M-H]-          | 4298            | 6.29E+03                       | 1.17E+06     | 103.041        | 103.0401      | C4H8O3                 | Hydroxybutanoic acid |
| 3.35                 | [M-H]-          | 638700          | 6.42E+05                       | 6.43E+05     | 205.036        | 205.0356      | C7H10O7                | Homocitric acid      |
| 5.97                 | [M-H]-          | 803100          | 2.31E+05                       | 5.76E+05     | 218.104        | 218.1036      | C9H17NO5               | Pantothenic acid     |
| 8.65                 | [M-H]-          | 211100          | 2.16E+05                       | 1.20E+05     | 259.077        | 259.0761      | C18H12O2               | Pyreneacetic acid    |
| 9.95                 | [M-H]-          | 329500          | 2.88E+05                       | 3.18E+05     | 191.021        | 191.0191      | C6H8O7                 | Citric acid          |
| 10.01                | [M-H]-          | 0               | 0.00E+00                       | 4.78E+04     | 355.068        | 355.0656      | C12H8N10O4             | Binicotinic acid     |
| 11.3                 | [M-H]-          | 0               | 2.74E+05                       | 2.21E+05     | 157.051        | 157.0512      | C7H10O4                | Dioxoheptanoic acid  |
| 11.56                | [M-H]-          | 0               | 0.00E+00                       | 3.91E+02     | 131.072        | 131.0713      | C6H12O3                | Butoxyacetic acid    |
| 12.96                | [M-H]-          | 0               | 0.00E+00                       | 7.74E+02     | 173.083        | 173.0821      | C8H14O4                | Suberic acid         |
| 13.33                | [M-H]-          | 0               | 0.00E+00                       | 3.99E+03     | 237.041        | 237.0406      | C11H10O6               | Oxobutyric acid      |
| 15.81                | [M-H]-          | 0               | 3.98E+05                       | 3.49E+05     | 201.114        | 201.1134      | C10H18O4               | Sebacic acid         |
| 17.27                | [M-H]-          | 0               | 0.00E+00                       | 1.31E+04     | 327.219        | 327.2178      | C18H32O5               | Malyngic acid        |
| 18.55                | [M-H]-          | 0               | 0.00E+00                       | 6.41E+05     | 333.131        | 333.13        | C13H22N2O8             | Pseudaminic acid     |
| 19.2                 | [M-H]-          | 0               | 1.84E+05                       | 5.15E+04     | 154.975        | 154.9742      | C5H4N2S2               | Pyrazinoic acid      |
| 19.62                | [M-H]-          | 0               | 2.92E+05                       | 3.47E+05     | 297.208        | 297.2073      | C17H30O4               | Butanedioic acid     |

**Table S3.** Amino acids in destarched rice, Prozyme treated destarched rice (DP) and fermented DP.

| Retention time (min) | Adduct / Charge | Peak area       |                                |              | Precursor mass | Found at mass | Formula finder results | Amino acids                 |
|----------------------|-----------------|-----------------|--------------------------------|--------------|----------------|---------------|------------------------|-----------------------------|
|                      |                 | Destarched rice | Destarched rice + Prozyme (DP) | Fermented DP |                |               |                        |                             |
| 0.89                 | [M-H]-          | 6573            | 4.05E+05                       | 514400       | 131.084        | 131.0827      | C5H12N2O2              | Ornithine                   |
| 0.89                 | [M-H]-          | 31680           | 1.57E+06                       | 1159000      | 154.063        | 154.0624      | C6H9N3O2               | Histidine                   |
| 0.95                 | [M-H]-          | 36870           | 0                              | 1681000      | 104.036        | 104.0354      | C3H7NO3                | Serine                      |
| 0.97                 | [M-H]-          | 183500          | 5.81E+05                       | 501000       | 131.047        | 131.0463      | C4H8N2O3               | Asparagine                  |
| 0.97                 | [M-H]-          | 597800          | 1.06E+06                       | 623200       | 132.031        | 132.0303      | C4H7NO4                | Aspartic acid               |
| 0.97                 | [M-H]-          | 278200          | 1.57E+06                       | 2685000      | 102.057        | 102.0561      | C4H9NO2                | $\alpha$ -Aminobutyric acid |
| 0.97                 | [M-H]-          | 105800          | 4.15E+05                       | 703500       | 146.047        | 146.0459      | C5H9NO4                | Glutamic acid               |
| 0.97                 | [M-H]-          | 530100          | 2.45E+06                       | 4215000      | 145.063        | 145.0619      | C5H10N2O3              | Glutamine                   |
| 0.98                 | [M-H]-          | 154100          | 7.95E+05                       | 415600       | 118.052        | 118.051       | C4H9NO3                | Threonine                   |
| 1.26                 | [M-H]-          | 44610           | 3.12E+06                       | 4225000      | 148.045        | 148.0441      | C5H11NO2S              | Methionine                  |
| 1.55                 | [M-H]-          | 95130           | 6.26E+06                       | 2249000      | 128.036        | 128.0354      | C5H7NO3                | Pyroglutamic acid           |
| 1.76                 | [M-H]-          | 115300          | 0                              | 0            | 130.088        | 130.0874      | C6H13NO2               | Leucine                     |
| 3.13                 | [M-H]-          | 3404            | 7.80E+03                       | 0            | 164.073        | 164.0717      | C9H11NO2               | Phenylalanine               |
| 6.03                 | [M-H]-          | 47720           | 2.57E+06                       | 0            | 203.084        | 203.0828      | C11H12N2O2             | Tryptophan                  |
| 12.27                | [M-H]-          | 283200          | 0                              | 0            | 339.106        | 339.1052      | C12H16N6O6             | Arginine                    |
| 14.89                | [M-H]-          | 0               | 8.16E+05                       | 5.43E+05     | 269.047        | 269.0444      | C7H14N2O7S             | Cysteic acid                |

**Table S4.** Phenolic compounds in destarched rice, Prozyme treated destarched rice (DP) and fermented DP.

| Retention Time (min) | Adduct / Charge | Peak area       |                                |              | Precursor Mass | Found At Mass | Formula Finder Results | Phenolic compounds      |
|----------------------|-----------------|-----------------|--------------------------------|--------------|----------------|---------------|------------------------|-------------------------|
|                      |                 | Destarched rice | Destarched rice + Prozyme (DP) | Fermented DP |                |               |                        |                         |
| 3.16                 | [M-H]-          | 519400          | 0                              | 0            | 147.046        | 147.0453      | C9H8O2                 | Cinnamic acid           |
| 8.23                 | [M-H]-          | 164500          | 1.95E+05                       | 1.51E+04     | 181.052        | 181.0507      | C14H22O2               | Veratric acid           |
| 10.37                | [M-H]-          | 130500          | 1.23E+05                       | 1.28E+05     | 167.036        | 167.0349      | C8H8O4                 | Vanillic acid           |
| 11.15                | [M-H]-          | 13660           | 1.23E+06                       | 1.17E+06     | 197.047        | 197.0453      | C9H10O5                | Ethyl gallate           |
| 11.17                | [M-H]-          | 18370           | 2.04E+04                       | 1.59E+07     | 197.047        | 197.0453      | C9H10O5                | Syringic acid           |
| 11.17                | [M-H]-          | 8533            | 0                              | 0.00E+00     | 163.077        | 163.0765      | C10H12O2               | Eugenol                 |
| 12                   | [M-H]-          | 431300          | 3.76E+05                       | 4.77E+05     | 163.041        | 163.04        | C9H8O3                 | Coumarinic acid         |
| 12.34                | [M-H]-          | 718600          | 8.02E+05                       | 7.85E+05     | 305.071        | 305.067       | C15H14O7               | Epigallocatechin        |
| 12.59                | [M-H]-          | 68830           | 3.80E+05                       | 1.68E+05     | 193.052        | 193.0508      | C10H10O4               | Ferulic acid            |
| 14.3                 | [M-H]-          | 0               | 0                              | 6.40E+05     | 269.047        | 269.0456      | C15H10O5               | Apigenin                |
| 14.95                | [M-H]-          | 0               | 2.60E+02                       | 1.98E+06     | 253.052        | 253.0509      | C15H10O4               | Chrysophanol            |
| 15.35                | [M-H]-          | 0               | 0                              | 7.48E+03     | 301.036        | 301.0357      | C15H10O7               | Quercetin               |
| 17.8                 | [M-H]-          | 0               | 0                              | 7.85E+03     | 431.173        | 431.1715      | C23H28O8               | Flavaspidic acid PB     |
| 18.19                | [M-H]-          | 0               | 0                              | 6.27E+04     | 309.172        | 309.1709      | C17H26O5               | Dodecyl gallate         |
| 19.71                | [M-H]-          | 0               | 0                              | 2.89E+04     | 277.182        | 277.1809      | C10H12O2               | Paradol                 |
| 20.17                | [M-H]-          | 0               | 6.60E+05                       | 6.64E+05     | 221.156        | 221.1547      | C14H22O2               | 3,5-Di-tert-butylphenol |
| 20.17                | [M-H]-          | 56110           | 0                              | 1.86E+06     | 173.01         | 173.0093      | C14H22O2               | Benzenehexol            |
